# Supplementary material for: Effect of Text Messaging and Behavioral Interventions on COVID-19 Vaccination Uptake: A Randomized Clinical Trial
Source: PubMed Central journal article supplement (PMC9194662; doi:10.1001/jamanetworkopen.2022.16649), 2022-06-13
Supplement: jamanetwopen-e2216649-s00.pdf [file jamanetwopen-e2216649-s00.pdf]

## Data Sharing Statement

Mehta. Effect of Text Messaging and Behavioral Interventions on COVID-19 Vaccination Uptake. *JAMA Netw Open*. Published June 13, 2022.

doi:10.1001/jamanetworkopen.2022.16649

### Data

**Data available:** No

### Additional Information

**Explanation for why data not available:** We do not have health system and IRB approval
