# Supplementary material for: Effect of Text Messaging and Behavioral Interventions on COVID-19 Vaccination Uptake: A Randomized Clinical Trial
Source: PubMed Central journal article supplement (PMC9194662; doi:10.1001/jamanetworkopen.2022.16649), 2022-06-13
Supplement: jamanetwopen-e2216649-s002.pdf [file jamanetwopen-e2216649-s002.pdf]

## Supplementary Online Content

Mehta SJ, Mallozzi C, Shaw PA, et al. Effect of text messaging and behavioral interventions on COVID-19 vaccination uptake: a randomized clinical trial. *JAMA Netw Open*. 2022;5(6):e2216649. doi:10.1001/jamanetworkopen.2022.16649

**eTable 1.** Vaccine Received Prior to Outreach

**eTable 2.** Dose 1 Completion in One Month by Subgroup (Scheduling Modality)

**eTable 3.** Dose 1 Completion in One Month by Subgroup (Messaging Content)

**eTable 4.** Final Text Response

This supplementary material has been provided by the authors to give readers additional information about their work.

**eTable 1.** Vaccine Received Prior to Outreach

| Study Group                                       | Outbound Phone Only | Text + Outbound Call |                       |            |            | Text + Inbound Call |                       |            |            | Total        |
|---------------------------------------------------|---------------------|----------------------|-----------------------|------------|------------|---------------------|-----------------------|------------|------------|--------------|
|                                                   |                     | Standard Messaging   | Clinician Endorsement | Scarcity   | Endowment  | Standard Messaging  | Clinician Endorsement | Scarcity   | Endowment  |              |
| <b>N</b>                                          | 472                 | 2,393                | 2,389                 | 2,392      | 2,385      | 2,380               | 2,382                 | 2,383      | 2,378      | 19,554       |
| <b>Rcv'd 1 Dose Prior, N (%)</b>                  | 82 (17.4)           | 422 (17.6)           | 404 (16.9)            | 415 (17.4) | 428 (18.0) | 462 (19.4)          | 447 (18.8)            | 449 (18.8) | 400 (16.8) | 3,509 (18.0) |
| <b>Rcv'd Full Series<sup>1</sup> Prior, N (%)</b> | 52 (11.0)           | 279 (11.7)           | 262 (11.0)            | 278 (11.6) | 273 (11.5) | 327 (13.7)          | 274 (11.5)            | 315 (13.2) | 255 (10.7) | 2,315 (11.8) |

<sup>1</sup> All patients that received the full series are included in the group that received 1 dose.

**eTable 2.** Dose 1 Completion in One Month by Subgroup (Scheduling Modality)

|                                    | Outbound Phone Only<br>N (%) | Text + Outbound Call<br>N (%) | Text + Inbound Call<br>N (%) | Treatment Effect Size<br>Log OR (95% CI)<br>(Text + Outbound Call v<br>Outbound Call Only) | Treatment Effect Size<br>Log OR (95% CI)<br>(Text + Inbound Call v<br>Outbound Call Only) |
|------------------------------------|------------------------------|-------------------------------|------------------------------|--------------------------------------------------------------------------------------------|-------------------------------------------------------------------------------------------|
| <b>Overall</b>                     | 14/390                       | 243/7,890                     | 253/7,765                    | -0.14 (-0.69 – 0.41)                                                                       | -0.07 (-0.62 – 0.49)                                                                      |
| <b>Sex</b>                         |                              |                               |                              |                                                                                            |                                                                                           |
| Male                               | 7/155 (4.5)                  | 104/3,237 (3.2)               | 94/3,235 (2.9)               | -0.38 (-1.73 – 0.97)                                                                       | -0.47 (-1.81 – 0.88)                                                                      |
| Female                             | 7/235 (3.0)                  | 139/4,653 (3.0)               | 159/4,530 (3.5)              | 0.05 (-0.71 – 0.82)                                                                        | 0.23 (-0.54 – 0.99)                                                                       |
| <b>Race</b>                        |                              |                               |                              |                                                                                            |                                                                                           |
| White                              | 2/189 (1.1)                  | 87/4,117 (2.1)                | 73/4,039 (1.8)               | 0.43 (-0.67 – 1.53)                                                                        | 0.27 (-0.83 – 1.37)                                                                       |
| Black                              | 8/127 (6.3)                  | 117/2,338 (5.0)               | 137/2,241 (6.1)              | -0.26 (-2.00 – 1.47)                                                                       | -0.05 (-1.78 – 1.69)                                                                      |
| Asian/Pacific Islander             | 3/26 (11.5)                  | 18/600 (3.0)                  | 17/614 (2.8)                 | -1.46 (-3.45 – 0.53)                                                                       | -1.48 (-3.48 – 0.51)                                                                      |
| Other <sup>1</sup>                 | 1/48 (2.1)                   | 21/835 (2.5)                  | 26/871 (3.0)                 | 0.74 (-2.70 – 4.18)                                                                        | 0.27 (-0.83 – 1.37)                                                                       |
| <b>Ethnicity</b>                   |                              |                               |                              |                                                                                            |                                                                                           |
| Hispanic                           | 1/26 (3.9)                   | 19/486 (3.9)                  | 21/455 (4.6)                 | 0.21 (-2.48 – 2.91)                                                                        | 0.34 (-2.35 – 3.03)                                                                       |
| Not-Hispanic                       | 13/352 (3.7)                 | 217/7,238 (3.0)               | 226/7,136 (3.2)              | -0.20 (-4.05 – 3.66)                                                                       | -0.12 (-3.97 – 3.72)                                                                      |
| Other <sup>2</sup>                 | 0/12 (0.0)                   | 7/166 (4.2)                   | 6/174 (3.4)                  | 1.49 (-2.50 – 5.47)                                                                        | 1.32 (-2.67 – 5.31)                                                                       |
| <b>Age Category</b>                |                              |                               |                              |                                                                                            |                                                                                           |
| 18-29                              | 7/129 (5.4)                  | 72/2,162 (3.3)                | 72/2,187 (3.3)               | -0.35 (-1.22 – 0.52)                                                                       | -0.36 (-1.23 – 0.51)                                                                      |
| 30-39                              | 2/127 (1.6)                  | 74/3,129 (2.4)                | 65/3,034 (2.1)               | 0.27 (-1.50 – 2.04)                                                                        | 0.16 (-1.61 – 1.93)                                                                       |
| 40-49                              | 2/73 (2.7)                   | 48/1,386 (4.2)                | 56/1,379 (4.1)               | 0.03 (-1.77 – 1.82)                                                                        | 0.24 (-1.55 – 2.03)                                                                       |
| 50-64                              | 3/60 (5.0)                   | 48/1,143 (4.2)                | 57/1,109 (5.1)               | -0.21 (-1.94 – 1.51)                                                                       | 0.00 (-1.72 – 1.71)                                                                       |
| 65+                                | 0/1 (0.0)                    | 1/70 (1.4)                    | 3/56 (5.4)                   | -1.32 (-4.60 – 1.95)                                                                       | 0.54 (-2.22 – 3.30)                                                                       |
| <b>Income Quartile<sup>3</sup></b> |                              |                               |                              |                                                                                            |                                                                                           |
| < \$35,000 / Unknown <sup>4</sup>  | 7/112 (6.3)                  | 88/2,180 (4.0)                | 100/2,104 (4.8)              | -0.49 (-1.27 – 0.29)                                                                       | -0.28 (-1.05 – 0.50)                                                                      |
| \$35,000 – 59,999                  | 6/92 (6.5)                   | 81/1,999 (4.1)                | 82/1,959 (4.2)               | -0.48 (-1.90 – 0.94)                                                                       | -0.46 (-1.87 – 0.96)                                                                      |
| \$60,000 – 76,099                  | 1/68 (1.5)                   | 33/1,507 (2.2)                | 29/1,517 (1.9)               | 0.76 (-1.98 – 3.51)                                                                        | 0.60 (-2.14 – 3.34)                                                                       |
| ≥ \$76,100                         | 0/118 (0.0)                  | 41/2,204 (1.9)                | 42/2,185 (1.9)               | 3.82 (2.66 – 4.98)                                                                         | 3.85 (2.69 – 5.01)                                                                        |
| <b>Patient Portal Status</b>       |                              |                               |                              |                                                                                            |                                                                                           |
| Active                             | 12/308 (3.9)                 | 206/6,419 (3.2)               | 207/6,335 (3.3)              | -0.38 (-1.73 – 0.97)                                                                       | -0.47 (-1.81 – 0.88)                                                                      |
| Inactive                           | 2/82 (2.4)                   | 37/1,471 (2.5)                | 46/1,430 (3.2)               | -0.04 (-1.49 – 1.40)                                                                       | 0.25 (-1.19 – 1.69)                                                                       |
| <b>Insurance Coverage Type</b>     |                              |                               |                              |                                                                                            |                                                                                           |
| Commercial                         | 9/308 (2.9)                  | 176/6,309 (2.8)               | 176/6,252 (2.8)              | 0.02 (-0.68 – 0.71)                                                                        | 0.02 (-0.67 – 0.71)                                                                       |
| Medicaid                           | 4/59 (6.8)                   | 51/1,135 (4.5)                | 63/1,089 (5.8)               | -0.57 (-1.99 – 0.85)                                                                       | -0.27 (-1.68 – 1.15)                                                                      |
| Medicare                           | 0/5 (0)                      | 10/138 (7.2)                  | 7/112 (6.3)                  | 0.61 (-0.92 – 2.14)                                                                        | 0.53 (-1.06 – 2.13)                                                                       |
| Other <sup>5</sup>                 | 1/18 (5.6)                   | 6/308 (1.9)                   | 7/312 (2.2)                  | -0.56 (-3.72 – 2.60)                                                                       | -0.39 (-3.53 – 2.75)                                                                      |
| <b>Last Patient Visit</b>          |                              |                               |                              |                                                                                            |                                                                                           |
| ≤ 2 Years                          | 12/316 (3.8)                 | 227/6,456 (3.5)               | 242/6,336 (3.8)              | -0.05 (-2.35 – 2.25)                                                                       | 0.05 (-2.29 – 2.38)                                                                       |
| > 2 Years                          | 2/74 (2.7)                   | 16/1,431 (1.1)                | 11/1,429 (0.8)               | -0.80 (-2.37 – 0.77)                                                                       | -1.17 (-2.77 – 0.43)                                                                      |

<sup>1</sup> Other was combined with American Indian, Unknown, and Refused due to very small sample size

<sup>2</sup> Other was combined with Unknown and Refused due to very small sample size

<sup>3</sup> American Community Survey (2015-2019) Median Household Income in 2019 inflation adjusted dollars

<sup>4</sup> Missing/Unknown was combined with <\$35,000 due to very small sample size

<sup>5</sup> Other was combined with No Insurance and Unknown due to very small sample size

**eTable 3.** Dose 1 Completion in One Month by Subgroup (Messaging Content)

|                                   | Standard Msg, N (%) | Clinician Endorse, N (%) | Scarcity, N (%) | Endowment, N (%) | Treatment Effect Size Log OR (95% CI) (Endorsement v Standard Msg) | Treatment Effect Size Log OR (95% CI) (Scarcity v Standard Msg) | Treatment Effect Size Log OR (95% CI) (Endowment v Standard Msg) |
|-----------------------------------|---------------------|--------------------------|-----------------|------------------|--------------------------------------------------------------------|-----------------------------------------------------------------|------------------------------------------------------------------|
| <b>Sex</b>                        |                     |                          |                 |                  |                                                                    |                                                                 |                                                                  |
| Male                              | 43/1,611 (2.7)      | 54/1,622 (3.3)           | 48/1,575 (3.1)  | 53/1,664 (3.2)   | 0.20 (-0.42 – 0.81)                                                | 0.07 (-0.59 – 0.73)                                             | 0.16 (-0.44 – 0.77)                                              |
| Female                            | 75/2,278 (3.3)      | 81/2,298 (3.5)           | 52/2,336 (2.2)  | 90/2,271 (4.0)   | 0.11 (-0.22 – 0.43)                                                | -0.38 (-0.74 - -0.02)                                           | 0.19 (-0.12 – 0.51)                                              |
| <b>Race</b>                       |                     |                          |                 |                  |                                                                    |                                                                 |                                                                  |
| White                             | 49/2,031 (2.4)      | 44/2,041 (2.2)           | 29/2,032 (1.4)  | 38/2,052 (1.9)   | -0.13 (-0.55 – 0.28)                                               | -0.53 (-1.00 - -0.07)                                           | -0.30 (-0.73 – 0.13)                                             |
| Black                             | 49/1,131 (4.3)      | 73 /1,147 (6.4)          | 53/1,151 (4.6)  | 79/1,150 (6.9)   | 0.44 (-0.25 – 1.13)                                                | 0.06 (-0.71 – 0.83)                                             | 0.50 (-0.21 – 1.21)                                              |
| Asian/Pacific Islander            | 8/295 (2.7)         | 12/314 (3.8)             | 6/298 (2.0)     | 9/307 (2.9)      | 0.31 (-0.77 – 1.39)                                                | -0.37 (-1.62 – 0.88)                                            | 0.05 (-1.08 – 1.19)                                              |
| Other <sup>1</sup>                | 12/432 (2.8)        | 6/418 (1.4)              | 12/430 (2.8)    | 17/426 (4.0)     | -0.65 (-1.81 – 0.50)                                               | -0.06 (-1.10 – 0.99)                                            | 0.34 (-0.63 – 1.31)                                              |
| <b>Ethnicity</b>                  |                     |                          |                 |                  |                                                                    |                                                                 |                                                                  |
| Hispanic                          | 13/234 (5.6)        | 15/245 (6.1)             | 2/229 (0.9)     | 10/233 (4.3)     | 0.21 (-0.59 – 1.00)                                                | -1.98 (-3.58 - -0.39)                                           | -0.31 (-1.18 – 0.55)                                             |
| Not-Hispanic                      | 103/3,566 (2.9)     | 119/3,585 (3.3)          | 94/3,608 (2.6)  | 127/3,615 (3.5)  | 0.15 (-1.01 – 1.30)                                                | -0.12 (-2.40 – 2.16)                                            | 0.21 (-1.05 – 1.46)                                              |
| Other <sup>2</sup>                | 2/89 (2.2)          | 1/90 (1.1)               | 4/74 (5.4)      | 6/87 (6.9)       | -0.88 (-3.57 – 1.82)                                               | 0.79 (-1.90 – 3.48)                                             | 0.85 (-1.11 – 2.80)                                              |
| <b>Age</b>                        |                     |                          |                 |                  |                                                                    |                                                                 |                                                                  |
| 18-29                             | 36/1,080 (3.3)      | 38/1,019 (3.7)           | 28/1,123 (2.5)  | 42/1,127 (3.7)   | 0.14 (-0.32 – 0.61)                                                | -0.28 (-0.79 – 0.23)                                            | 0.09 (-0.37 – 0.43)                                              |
| 30-39                             | 34/1,565 (2.2)      | 39/1,587 (2.5)           | 29/1,520 (1.9)  | 37/1,491 (2.5)   | 0.12 (-0.69 – 0.93)                                                | -0.15 (-1.03 – 0.73)                                            | 0.13 (-0.68 – 0.94)                                              |
| 40-49                             | 22/673 (3.3)        | 30/718 (4.2)             | 26/669 (3.9)    | 26/705 (3.7)     | 0.25 (-0.61 – 1.12)                                                | 0.17 (-0.75 – 1.10)                                             | 0.15 (-0.73 – 1.02)                                              |
| 50-64                             | 25/541 (4.6)        | 28/571 (4.9)             | 17/565 (3.0)    | 35/575 (6.1)     | 0.11 (-0.75 – 0.97)                                                | -0.48 (-1.44 – 0.48)                                            | 0.35 (-0.49 – 1.19)                                              |
| 65+                               | 1/30 (3.3)          | 0/25 (0.0)               | 0/34 (0.0)      | 3/37 (8.1)       | -7.0 (-9.26 - -4.75)                                               | -6.27 (-8.53 - -4.02)                                           | 0.56 (-1.97 – 3.10)                                              |
| <b>Income<sup>3</sup></b>         |                     |                          |                 |                  |                                                                    |                                                                 |                                                                  |
| < \$35,000 / Unknown <sup>4</sup> | 46/1,056 (4.4)      | 54/1,090 (5.0)           | 34/1,080 (3.1)  | 54/1,058 (5.1)   | 0.15 (-0.26 – 0.55)                                                | -0.35 (-0.80 – 0.10)                                            | 0.15 (-0.25 – 0.56)                                              |
| \$35,000 – 59,999                 | 38/984 (3.9)        | 36/951 (3.8)             | 38/1,007 (3.8)  | 51/1,016 (5.0)   | -0.01 (-0.75 – 0.73)                                               | -0.03 (-0.83 - 0.76)                                            | 0.27 (-0.45 – 0.99)                                              |
| \$60,000 – 76,099                 | 20/765 (2.6)        | 18/758 (2.4)             | 13/740 (1.8)    | 11/761 (1.5)     | -0.14 (-1.00 – 0.73)                                               | -0.41 (-1.36 – 0.55)                                            | -0.61 (-1.55 – 0.33)                                             |
| ≥ \$76,100                        | 14/1,084 (1.3)      | 27/1,121 (2.4)           | 15/1,084 (1.4)  | 27/1,100 (2.5)   | 0.66 (-0.22 – 1.54)                                                | 0.08 (-0.91 – 1.06)                                             | 0.66 (-0.22 – 1.54)                                              |
| <b>Patient Portal Status</b>      |                     |                          |                 |                  |                                                                    |                                                                 |                                                                  |
| Active                            | 99/3,134 (3.2)      | 112/3,200 (3.5)          | 83/3,162 (2.6)  | 119/3,258 (3.7)  | 0.11 (-0.81 – 1.04)                                                | -0.14 (-0.80 – 0.53)                                            | 0.15 (-0.76 – 1.07)                                              |
| Inactive                          | 19/755 (2.5)        | 23/720 (3.2)             | 17/749 (2.3)    | 24/677 (3.6)     | 0.27 (-0.36 – 0.89)                                                | -0.20 (-1.19 – 0.79)                                            | 0.31 (-0.31 – 0.92)                                              |
| <b>Insurance Coverage Type</b>    |                     |                          |                 |                  |                                                                    |                                                                 |                                                                  |
| Commercial                        | 79/3,149 (2.5)      | 98/3,133 (3.1)           | 68/3,131 (2.2)  | 107/3,148 (3.4)  | 0.23 (-0.08 – 0.53)                                                | -0.16 (-0.49 – 0.17)                                            | 0.30 (0.00 – 0.59)                                               |
| Medicaid                          | 27/548 (4.9)        | 32/537 (6.0)             | 27/569 (4.7)    | 28/570 (4.9)     | 0.23 (-0.46 – 0.91)                                                | -0.04 (-0.77 – 0.68)                                            | 0.03 (-0.66 – 0.73)                                              |
| Medicare                          | 7/54 (12.9)         | 2/70 (2.9)               | 3/62 (4.8)      | 5/64 (7.8)       | -1.65 (-3.42 – 0.11)                                               | -1.06 (-2.57 – 0.46)                                            | -0.56 (-1.86 – 0.73)                                             |
| Other <sup>5</sup>                | 5/138 (3.6)         | 3/180 (1.7)              | 2/149 (1.3)     | 3/153 (2.0)      | -0.67 (-2.20 – 0.86)                                               | -0.92 (-2.61 – 0.77)                                            | -0.57 (-2.11 – 0.97)                                             |
| <b>Last Patient Visit</b>         |                     |                          |                 |                  |                                                                    |                                                                 |                                                                  |
| <= 2 Years                        | 107/3,184 (3.4)     | 128/3,182 (4.0)          | 96/3,210 (3.0)  | 138/3,219 (4.3)  | 0.19 (-1.17 – 1.56)                                                | -0.13 (-1.79 (1.52)                                             | 0.25 (-1.29 (1.79)                                               |
| > 2 Years                         | 11/705 (1.6)        | 7/738 (0.9)              | 4/701 (0.6)     | 5/716 (0.7)      | -0.50 (-1.45 – 0.45)                                               | -1.00 (-2.15 – 0.16)                                            | -0.85 (-1.92 – 0.22)                                             |

<sup>1</sup> Other was combined with American Indian, Unknown, and Refused due to very small sample size

<sup>2</sup> Other was combined with Unknown and Refused due to very small sample size

<sup>3</sup> American Community Survey (2015-2019) Median Household Income in 2019 inflation adjusted dollars

<sup>4</sup> Missing/Unknown was combined with <\$35,000 due to very small sample size

<sup>5</sup> Other was combined with No Insurance and Unknown due to very small sample size

**eTable 4.** Final Text Response

| Outcome                                       | Text + Outbound Call         |                                   |                       |                        | Text + Inbound Call          |                                   |                       |                        | Total<br>(n=15,655) |
|-----------------------------------------------|------------------------------|-----------------------------------|-----------------------|------------------------|------------------------------|-----------------------------------|-----------------------|------------------------|---------------------|
|                                               | Standard<br>Msg<br>(n=1,971) | Clinician<br>Endorse<br>(n=1,985) | Scarcity<br>(n=1,977) | Endowment<br>(n=1,957) | Standard<br>Msg<br>(n=1,918) | Clinician<br>Endorse<br>(n=1,935) | Scarcity<br>(n=1,934) | Endowment<br>(n=1,978) |                     |
| Message Fail, N (%)                           | 87 (4.4)                     | 100 (5.0)                         | 84 (4.3)              | 101 (5.2)              | 90 (4.7)                     | 86 (4.4)                          | 76 (3.9)              | 99 (5.0)               | 723 (4.6)           |
| No Response ID, N (%)                         | 670 (34.0)                   | 625 (31.5)                        | 636 (32.2)            | 646 (33.0)             | 661 (34.5)                   | 594 (30.7)                        | 666 (34.4)            | 620(31.3)              | 5,118 (32.7)        |
| No Response Offer, N (%)                      | 60 (3.0)                     | 54 (2.7)                          | 55 (2.8)              | 51 (2.6)               | 64 (3.3)                     | 48 (2.5)                          | 53 (2.7)              | 41 (2.1)               | 426 (2.7)           |
| Yes, N (%)                                    | 47 (2.4)                     | 51 (2.6)                          | 55 (2.8)              | 52 (2.7)               | 68 (3.6)                     | 58 (3.0)                          | 58 (3.0)              | 69 (3.5)               | 458 (2.9)           |
| Info, N (%)                                   | 12 (0.6)                     | 19 (1.0)                          | 19 (1.0)              | 23 (1.2)               | 9 (0.5)                      | 17 (0.9)                          | 14 (0.7)              | 18 (0.9)               | 131 (0.8)           |
| Not Now, N (%)                                | 85 (4.3)                     | 84 (4.2)                          | 74 (3.7)              | 86 (4.4)               | 68 (3.6)                     | 75 (3.9)                          | 68 (3.5)              | 87 (4.4)               | 627 (4.0)           |
| Done, N (%)                                   | 435 (22.1)                   | 480 (24.2)                        | 467 (23.6)            | 445 (22.7)             | 445 (23.2)                   | 486 (25.1)                        | 435 (22.5)            | 468 (23.7)             | 3,661 (23.4)        |
| Call Me, <sup>1</sup> N (%)                   | 6 (0.3)                      | 3 (0.2)                           | 4 (0.2)               | 6 (0.3)                | 0 (0.0)                      | 4 (0.2)                           | 5 (0.3)               | 5 (0.3)                | 33 (0.2)            |
| Stop, N (%)                                   | 416 (21.1)                   | 447 (22.5)                        | 423 (21.4)            | 401 (20.5)             | 387 (20.2)                   | 422 (21.8)                        | 407 (21.0)            | 399 (20.2)             | 3,302 (21.1)        |
| Unstop, N (%)                                 | 8 (0.4)                      | 4 (0.2)                           | 11 (0.6)              | 7 (0.4)                | 5 (0.3)                      | 10 (0.5)                          | 9 (0.5)               | 0 (0.0)                | 54 (0.3)            |
| Wrong Patient, N (%)                          | 138 (7.0)                    | 113 (5.7)                         | 139 (7.0)             | 121 (6.2)              | 111 (5.8)                    | 128 (6.6)                         | 133 (6.9)             | 158 (8.0)              | 1,041 (6.7)         |
| Recode Already Vaccinated, <sup>2</sup> N (%) | 7 (0.4)                      | 5 (0.3)                           | 10 (0.5)              | 18 (0.9)               | 10 (0.5)                     | 7 (0.4)                           | 10 (0.5)              | 14 (0.7)               | 81 (0.5)            |

<sup>1</sup> Patients who texted 'Not Now' or 'Info' were given an option to reply 'Call Me' if they decided to schedule a vaccine appointment at a later date.

<sup>2</sup> Patients who did not reply DONE but who otherwise indicated by free text they had completed vaccination were recoded as "Already Vaccinated."
